# Supplementary material for: Can a community health worker administered postnatal checklist increase health-seeking behaviors and knowledge?: evidence from a randomized trial with a private maternity facility in Kiambu County, Kenya
Source: PubMed Central journal article supplement (PMC4893209; doi:10.1186/s12884-016-0914-z), 2016-06-04

Panel A. Self-Reported Postpartum Behaviors at 10 Days Postpartum

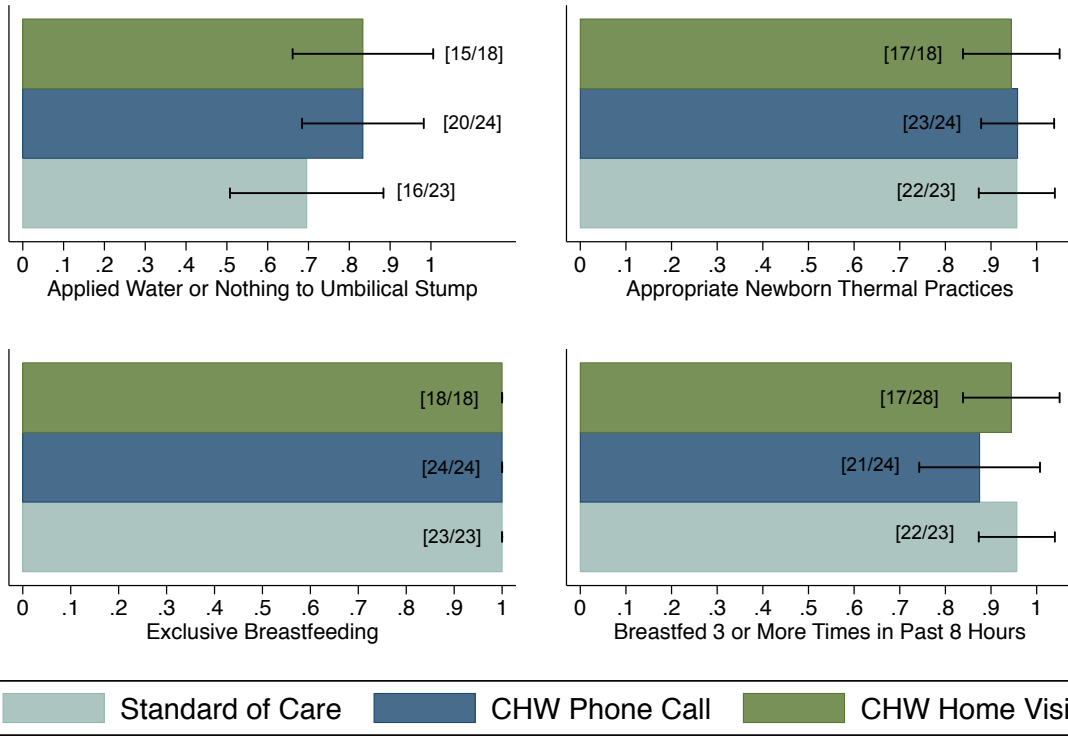

Panel B. Self-Reported Postpartum Behaviors at 9 Weeks Postpartum

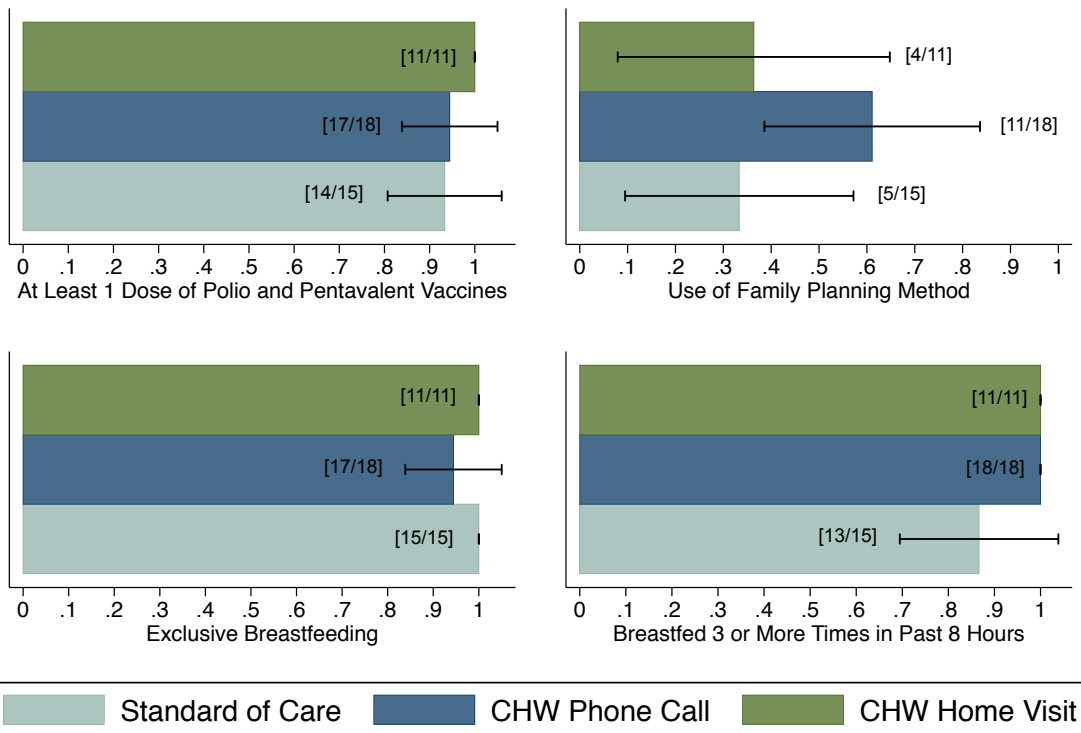

Supplement: 12884_2016_914_MOESM6_ESM.pdf [file 12884_2016_914_MOESM6_ESM.pdf]
